# Supplementary material for: Protection of the Queuosine Biosynthesis Enzyme QueF from Irreversible Oxidation by a Conserved Intramolecular Disulfide
Source: PubMed Central journal article supplement (PMC5372742; doi:10.3390/biom7010030), 2017-03-16
Supplement: biomolecules-07-00030-s001.pdf [file biomolecules-07-00030-s001.pdf]

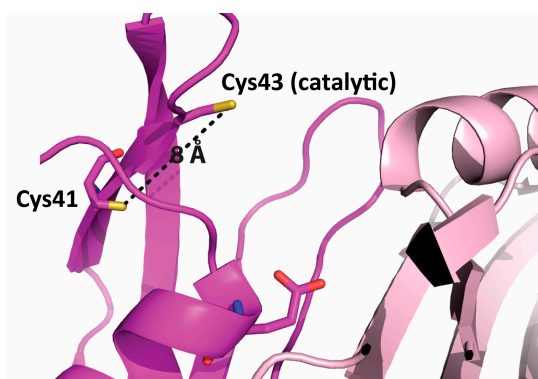

**Figure S1.** Active site region in a 3D homology model of a unimodular QueF protein that lacks a cysteine homologous to the disulfide Cys99 of *Bacillus subtilis* QueF, but contains an alternative backdoor cysteine located in proximity to the catalytic cysteine in the active site loop. The model is of the *Aquifex aeolicus* QueF protein and shows the catalytic cysteine and the putative alternative backdoor cysteine in *A. aeolicus* residue numbers. The two interface subunits making the active site are shown in two shades of magenta.

**Table S1.** Examples of bacterial pathogens classified based on the subfamily their QueF proteins belong to and the presence/absence of the disulfide forming Cys99 (and the homologous Cys236 in bimodular QueF) in the protein sequence.

| Human Pathogens               |                               |                                    |                                       | Plant Pathogens            |                                  |                                              | Total Sequences |
|-------------------------------|-------------------------------|------------------------------------|---------------------------------------|----------------------------|----------------------------------|----------------------------------------------|-----------------|
| Uni No Cys99                  | Uni No Cys99 and No Cys53     | Uni Cys99                          | Bi Cys236                             | Uni No Cys99               | Uni Cys99                        | Bi Cys236                                    |                 |
| 5                             | 1                             | 23                                 | 56                                    | 2                          | 13                               | 41                                           | 140             |
| <i>Campylobacter jejuni</i>   | <i>Leptospira interrogans</i> | <i>Veillonella</i>                 | <i>Acinetobacter</i>                  | <i>Bacillus megaterium</i> | <i>Acetobacter aceti</i>         | <i>Acidovorax avenae</i>                     |                 |
| <i>Campylobacter coli</i>     |                               | <i>lactobacillus</i>               | <i>Actinobacillus</i>                 | <i>Burkholderia</i>        | <i>Acetobacter pasteurianus</i>  | <i>Bacillus megaterium</i>                   |                 |
| <i>Campylobacter lari</i>     |                               | <i>Eubacterium</i>                 | <i>Aeromonas caviae</i>               |                            | <i>Agrobacterium larrymoorei</i> | <i>Brenneria</i>                             |                 |
| <i>Campylobacter fetus</i>    |                               | <i>prevotella</i>                  | <i>Aeromonas hydrophila</i>           |                            | <i>Agrobacterium radiobacter</i> | <i>Burkholderia andropogonis</i>             |                 |
| <i>Leptospira interrogans</i> |                               | <i>Porphyromonas</i>               | <i>Aeromonas veronii bovar sobria</i> |                            | <i>Aagrobacterium rhizogens</i>  | <i>Burkholderia cepacia</i>                  |                 |
|                               |                               | <i>fusobacterium</i>               | <i>Bordetella bronchiseptica</i>      |                            | <i>Agrobacterium rubi</i>        | <i>Burkholderia gladioli</i>                 |                 |
|                               |                               | <i>Bacillus anthracis</i>          | <i>Bordetella parapertussis</i>       |                            | <i>Agrobacterium tumefaciens</i> | <i>Burkholderia glumae</i>                   |                 |
|                               |                               | <i>Bacillus cereus</i>             | <i>Bordetella pertussis</i>           |                            | <i>Agrobacterium ophel</i>       | <i>Enterobacter cloacae</i>                  |                 |
|                               |                               | <i>Bacillus subtilis</i>           | <i>Burkholderia cepacia</i>           |                            | <i>Bacillus megaterium</i>       | <i>Enterobacter cloacae subsp dissolvens</i> |                 |
|                               |                               | <i>Bacillus thuringiensis</i>      | <i>Burkholderia pseudomallei</i>      |                            | <i>Bacillus pumilus</i>          | <i>Erwinia amylovora</i>                     |                 |
|                               |                               | <i>Bacillus stearothermophilus</i> | <i>Citrobacter freundii</i>           |                            | <i>Gluconobacter oxydans</i>     | <i>Erwinia mallotivora</i>                   |                 |
|                               |                               | <i>Bacteroides fragilis</i>        | <i>Edwardsiella tarda</i>             |                            | <i>Rhizobium rubi</i>            | <i>Erwinia pyrifoliae</i>                    |                 |
|                               |                               | <i>Brucella suis</i>               | <i>Enterobacter aerogenes</i>         |                            | <i>Sphingomonas melonis</i>      | <i>Erwinia tracheiphila</i>                  |                 |
|                               |                               | <i>Citrobacter freundii</i>        | <i>Enterobacter cloacae</i>           |                            |                                  | <i>Ewingella americana</i>                   |                 |
|                               |                               | <i>Helicobacter pylori</i>         | <i>Haemophilus ducreyi</i>            |                            |                                  | <i>Janthinobacterium agaricidammosum</i>     |                 |
|                               |                               | <i>Neisseria gonorrhoeae</i>       | <i>Haemophilus haemolyticus</i>       |                            |                                  | <i>Pantoea agglomerans</i>                   |                 |
|                               |                               | <i>Neisseria meningitidis</i>      | <i>Haemophilus influenzae</i>         |                            |                                  | <i>Pantoea ananatis</i>                      |                 |
|                               |                               | <i>Staphylococcus aureus</i>       | <i>Haemophilus parahaemolyticus</i>   |                            |                                  | <i>Pantoea stewartii subsp indologenes</i>   |                 |
|                               |                               | <i>Staphylococcus epidermidis</i>  | <i>Haemophilus parainfluenzae</i>     |                            |                                  | <i>Pantoea stewartii subsp. Stewartii</i>    |                 |
|                               |                               | <i>Streptococcus equisimilis</i>   | <i>Klebsiella oxytoca</i>             |                            |                                  | <i>Pectobacterium atrosepticum</i>           |                 |
|                               |                               | <i>Streptococcus mutans</i>        | <i>Klebsiella pneumoniae</i>          |                            |                                  | <i>Pectobacterium betavasculorum</i>         |                 |
|                               |                               | <i>Streptococcus salivarius</i>    | <i>Kegionella pneumophila</i>         |                            |                                  | <i>Pectobacterium carotovorum</i>            |                 |
|                               |                               | <i>Streptococcus mitis</i>         | <i>Koraxella catarrhalis</i>          |                            |                                  | <i>Pectobacterium wasabiae</i>               |                 |
|                               |                               |                                    | <i>Morganella morganii</i>            |                            |                                  | <i>Pseudomonas amygdali</i>                  |                 |
|                               |                               |                                    | <i>Pasteurella multocida</i>          |                            |                                  | <i>Pseudomonas avellanae</i>                 |                 |
|                               |                               |                                    | <i>Plesimonas shigelloides</i>        |                            |                                  | <i>Pseudomonas cichorii</i>                  |                 |
|                               |                               |                                    | <i>Proteus mirabilis</i>              |                            |                                  | <i>Pseudomonas corrugata</i>                 |                 |
|                               |                               |                                    |                                       |                            |                                  | <i>Pseudomonas fuscovaginae</i>              |                 |
|                               |                               |                                    |                                       |                            |                                  | <i>Pseudomonas mediterranea</i>              |                 |

Table S1. Cont.

---

|                                     |                                                   |
|-------------------------------------|---------------------------------------------------|
| <i>Proteus vulgaris</i>             | <i>Pseudomonas meliae</i>                         |
| <i>Providencia alcalifaciens</i>    | <i>Pseudomonas pseudoalcaligenes</i>              |
| <i>Providencia rettgeri</i>         | <i>Pseudomonas savastanoi</i>                     |
| <i>Providencia stuartii</i>         | <i>Pseudomonas savastanoi</i>                     |
| <i>Salmonella choleraesuis</i>      | <i>Pseudomonas syringae</i>                       |
| <i>Salmonella enterica</i>          | <i>Pseudomonas syringae</i> pv. <i>Maculicola</i> |
| <i>Salmonella enteritidis</i>       | <i>Pseudomonas tolaasii</i>                       |
| <i>Salmonella paratyphi</i>         | <i>Pseudomonas viridiflava</i>                    |
| <i>Salmonella typhi</i>             | <i>Ralstonia solanacearum</i>                     |
| <i>Salmonella typhimurium</i>       | <i>Ralstonia syzygii</i>                          |
| <i>Serratia marcescens</i>          | <i>Serratia marcescens</i>                        |
| <i>Shigella boydii</i>              | <i>Serratia proteamaculans</i>                    |
| <i>Shigella dysenteriae</i>         | <i>Xanthomonas albilineans</i>                    |
| <i>Shigella flexneri</i>            | <i>Xanthomonas arboricola</i>                     |
| <i>Shigella sonnei</i>              | <i>Xanthomonas axonopodis</i>                     |
| <i>Stenotrophomonas maltophilia</i> | <i>Xanthomonas campestris</i>                     |
| <i>Vibrio alginolyticus</i>         |                                                   |
| <i>Vibrio cholerae</i>              |                                                   |
| <i>Vibrio fluvialis</i>             |                                                   |
| <i>Vibrio furnisii</i>              |                                                   |
| <i>Vibrio hollisae</i>              |                                                   |
| <i>Vibrio mimicus</i>               |                                                   |
| <i>Vibrio parahaemolyticus</i>      |                                                   |
| <i>Vibrio vulnificus</i>            |                                                   |
| <i>Yersinia enterocolitica</i>      |                                                   |
| <i>Yersinia pestis</i>              |                                                   |
| <i>Yersinia pseudotuberculosis</i>  |                                                   |

---
